# Supplementary material
Source: HighWire-hosted journal article supplement (https://bmjopen.bmj.com/content/11/4/e046982)
Supplement: inline-supplementary-material-2 [file inline-supplementary-material-2.pdf]

## Supplementary File 1. Sample OVID-MEDLINE search strategy

|                                                                                                                                                                                                                                                                                                                                                                                                                                                                                                                                                                                                                                                                                                                                                                                                                                                                          |                                                                                                                                                                                                                                                                                                                                                                                                                                                                                                                                                                                                                                                                                |
|--------------------------------------------------------------------------------------------------------------------------------------------------------------------------------------------------------------------------------------------------------------------------------------------------------------------------------------------------------------------------------------------------------------------------------------------------------------------------------------------------------------------------------------------------------------------------------------------------------------------------------------------------------------------------------------------------------------------------------------------------------------------------------------------------------------------------------------------------------------------------|--------------------------------------------------------------------------------------------------------------------------------------------------------------------------------------------------------------------------------------------------------------------------------------------------------------------------------------------------------------------------------------------------------------------------------------------------------------------------------------------------------------------------------------------------------------------------------------------------------------------------------------------------------------------------------|
| Leadership/<br><br>Leadership.mp. [mp=title, abstract, original title, name of substance word, subject heading word, floating sub-heading word, keyword heading word, organism supplementary concept word, protocol supplementary concept word, unique identifier, synonyms]<br><br>career mobility/<br><br>career mobility.mp.<br><br>career progression.mp.<br><br>career advancement.mp.<br><br>1 or 2 or 3 or 4 or 5 or 6<br><br>exp Gender Identity/<br><br>Sex Factors/<br><br>Male/<br><br>Female/<br><br>Women/<br><br>exp Men/<br><br>women.mp.<br><br>men.mp.<br><br>female.mp.<br><br>male.mp.<br><br>woman.mp.<br><br>gender.mp.<br><br>sex factor.mp.<br><br>8 or 9 or 10 or 11 or 12 or 13 or 14 or 15 or 16 or 17 or 18 or 19 or 20<br><br>7 and 21<br><br>exp organizations/ or health services administration/ or exp "organization and administration" | Professional Corporations/<br><br>academia.mp.<br><br>business*.mp.<br><br>corporat*.mp.<br><br>organization*.mp.<br><br>institution*.mp.<br><br>industr*.mp.<br><br>workforce.mp.<br><br>workplace.mp.<br><br>work force.mp.<br><br>work place.mp.<br><br>association*.mp.<br><br>health services.mp.<br><br>23 or 24 or 25 or 26 or 27 or 28 or 29 or 30 or 31 or 32 or 33 or 34 or 35 or 36<br><br>22 and 37<br><br>leadership labryinth.mp.<br><br>leadership labyrinth. m_titl.<br><br>38 and 40<br><br>(reasons and remedies).mp.<br><br>(reasons and remedies).m_titl.<br><br>38 and 43<br><br>(reasons and remedies for under-representation).m_titl.<br><br>38 and 46 |
|--------------------------------------------------------------------------------------------------------------------------------------------------------------------------------------------------------------------------------------------------------------------------------------------------------------------------------------------------------------------------------------------------------------------------------------------------------------------------------------------------------------------------------------------------------------------------------------------------------------------------------------------------------------------------------------------------------------------------------------------------------------------------------------------------------------------------------------------------------------------------|--------------------------------------------------------------------------------------------------------------------------------------------------------------------------------------------------------------------------------------------------------------------------------------------------------------------------------------------------------------------------------------------------------------------------------------------------------------------------------------------------------------------------------------------------------------------------------------------------------------------------------------------------------------------------------|
